# Supplementary material for: Modified nanocarbon surfaces for high performance supercapacitor and electrocatalysis applications
Source: Royal Society of Chemistry journal article supplement (doi:10.1039/c5cc04236d), 2015-01-01
Supplement: c5cc04236d1.pdf [file c5cc04236d1.pdf]

Electronic supplementary information

## Modified nanocarbon surfaces for high performance supercapacitor and electrocatalysis applications

Mohammed Es-Souni and Dimitri Schopf

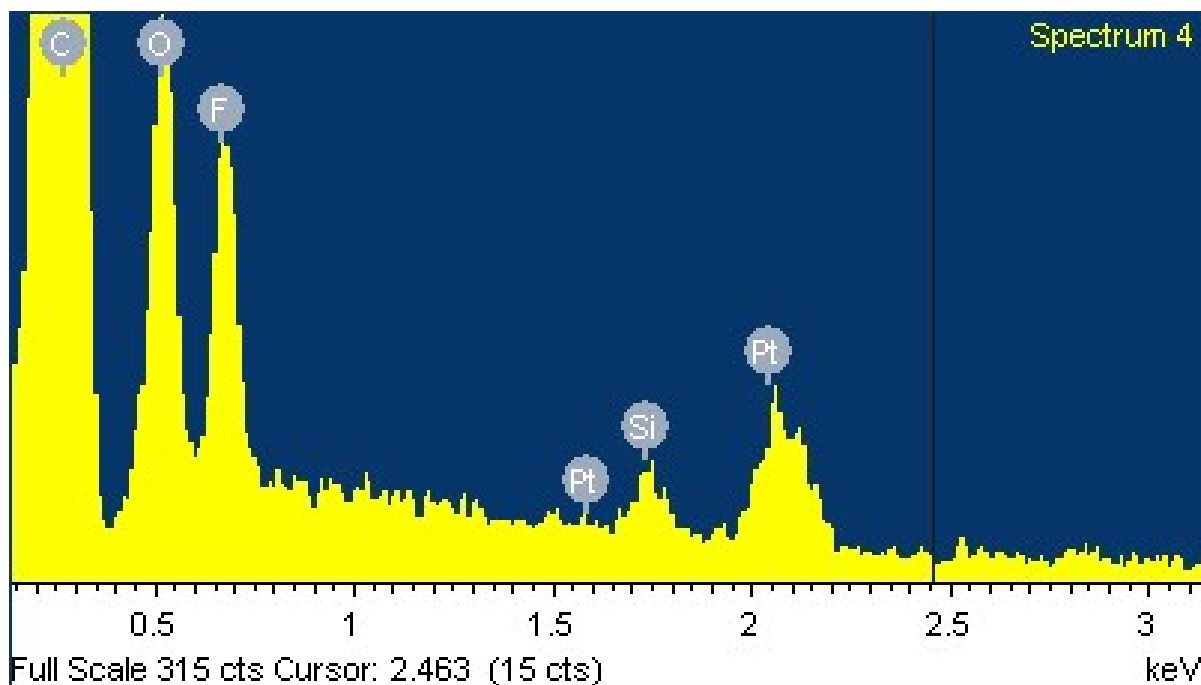

Fig. 1S: EDS analysis of the Nanocarbon-CNT-Pt-nanocomposite film

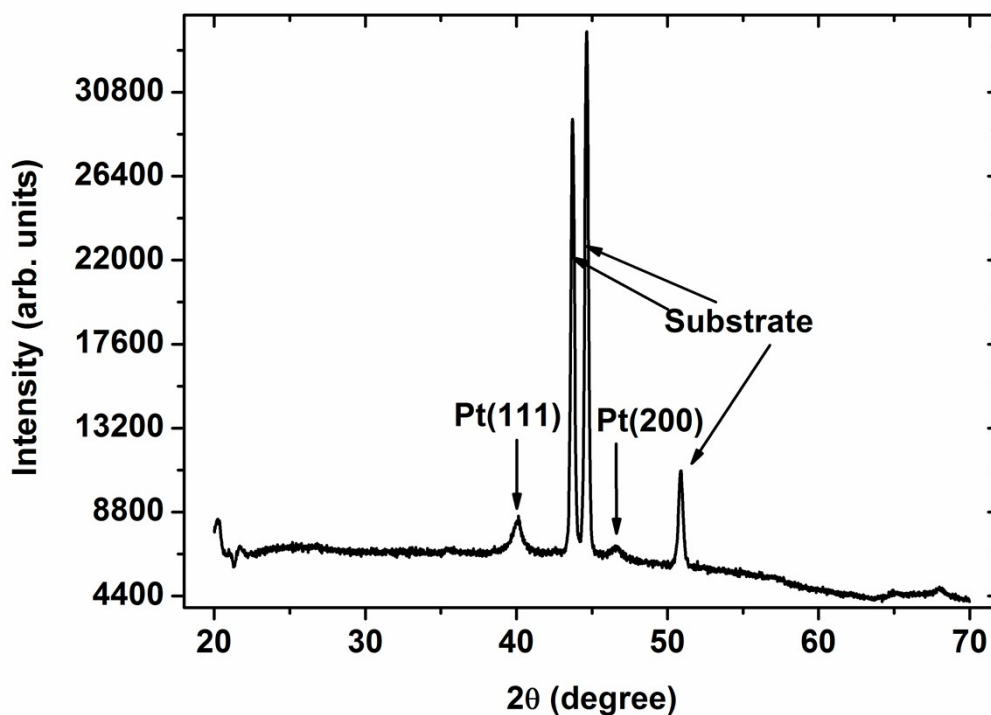

Fig. 2S: XRD patterns in grazing incidence mode of the Nanocarbon-CNT-Pt-nanocomposite film

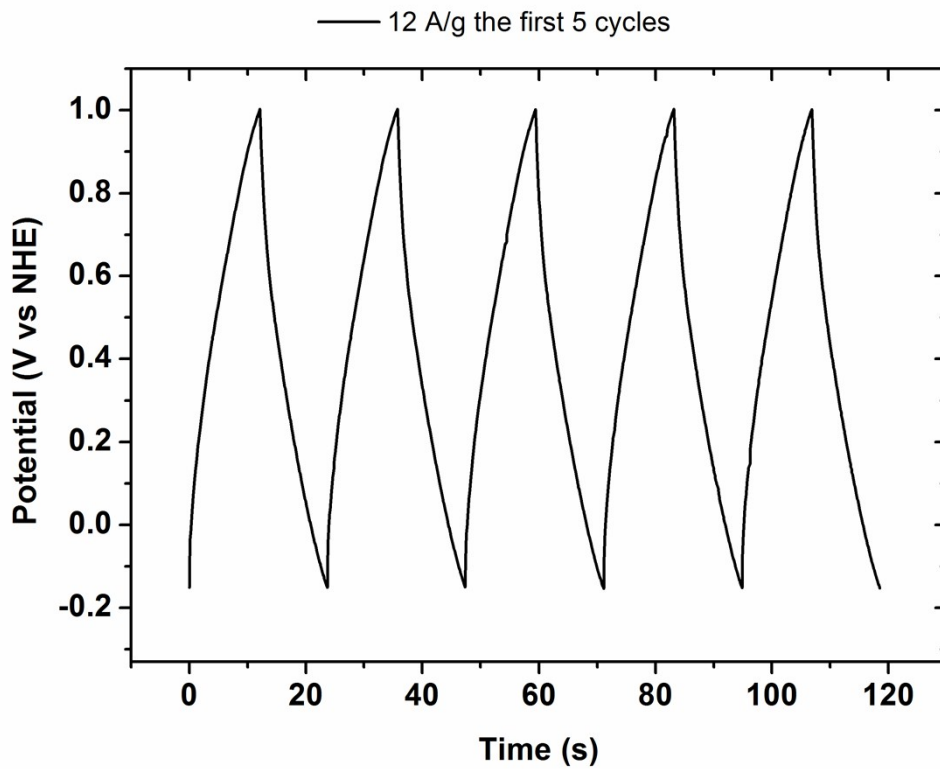

Fig. 3S: The first 5 cycles of the galvanostatic charge/discharge curves at 12 A/g of the Nanocarbon-CNT-nanocomposite film

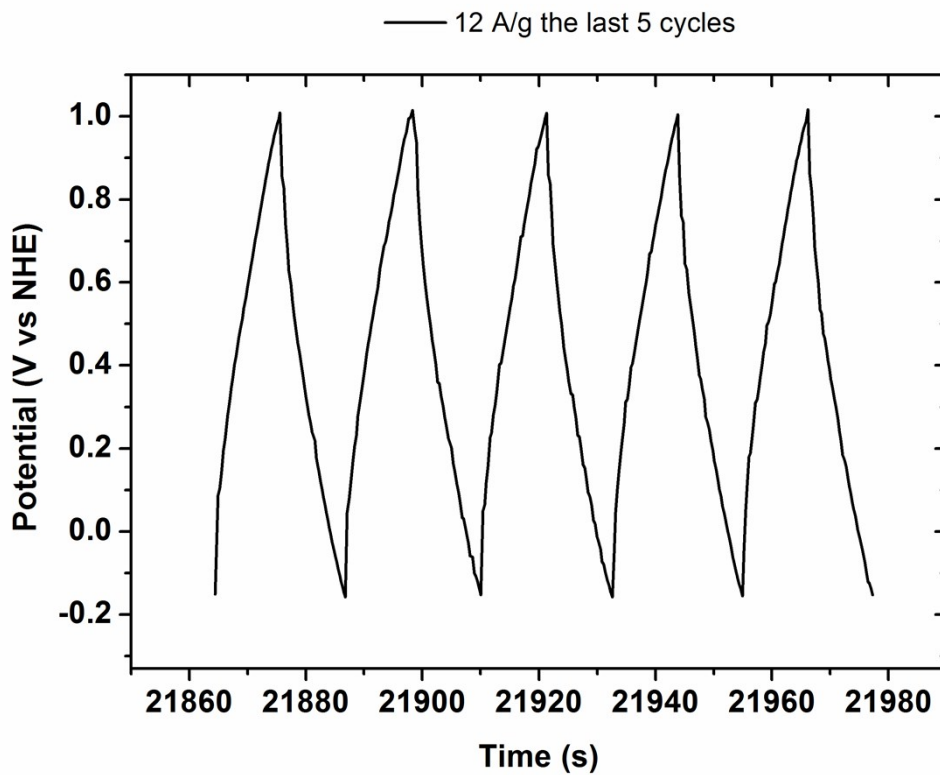

Fig. 4S: The last 5 cycles of the galvanostatic charge/discharge curves at 12 A/g of the Nanocarbon-CNT-nanocomposite film

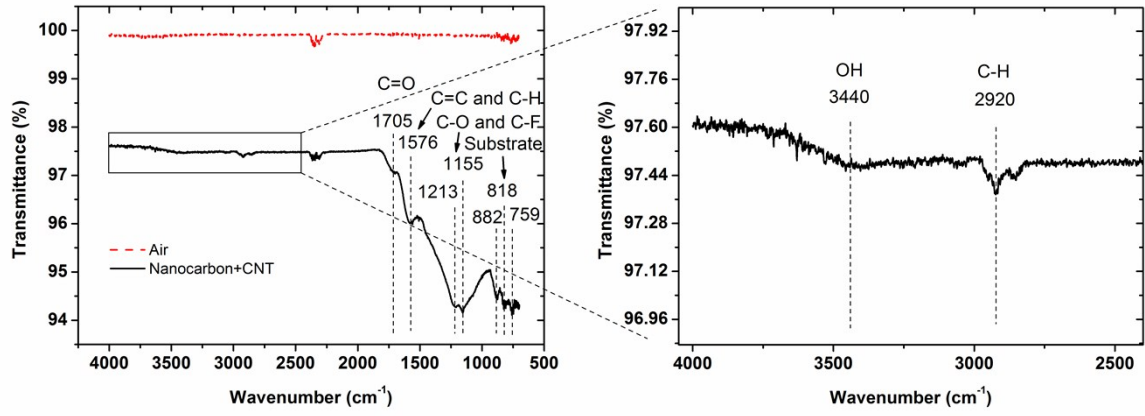

Fig. 5S: FTIR analysis of the Nanocarbon-CNT-nanocomposite film
